# Supplementary material for: Spatial correlation study on the impact of green financial development on industrial structure upgrading
Source: Frontiers journal article supplement (doi:10.3389/fenvs.2022.1017159), 2022-09-27
Supplement: Data_Sheet_1.xls [file Data_Sheet_1.xls]

## Sheet: 2010
	Green Investment	Green Insurance	Green Securities	Green Credit	Carbon Finance
Beijing	1.64	0.237763	16.425	13.2479	0
Tianjin	1.19	0.0212002	0.0181653	11.7294	0.8
Hebei	1.82	0.0264471	0.0222135	15.2372	7.2
Shanxi	2.25	0.00870254	0	8.31799	2.8
Inner Mongolia	2.05	0.165333	0	14.7048	10
Liaoning	1.12	0.0195256	0	15.7113	5
Jilin	1.43	0.092592	0	20.6184	5
Heilongjiang	1.27	0.105286	0.0122365	1.22019	1.8
Shanghai	0.78	0.156169	0	16.3952	0.6
Jiangsu	1.13	0.0297378	0.0123372	13.9761	2.2
Zhejiang	1.2	0.0164487	0.0352293	10.9226	1.6
Anhui	1.46	0.0807647	0	12.4658	1
Fujian	0.88	0.0178353	0.0197351	11.1566	2.6
Jiangxi	1.66	0.0450125	0.00532677	14.4448	0.8
Shandong	1.24	0.00592463	0	17.47	3
Henan	0.57	0.00504999	0.00740449	16.0392	4.2
Hubei	0.92	0.0262596	0.0435906	13.8159	2.4
Hunan	0.66	0.0519465	0	12.1353	3.4
Guangdong	3.08	0.00612999	0.0590717	9.04452	3.6
Guangxi	1.71	0.00556435	0	10.257	1
Hainan	1.14	0.0200907	0	7.22543	0.6
Chongqing	2.22	0.0107669	0.100935	19.7729	2
Sichuan	0.52	0.0590731	0.02326	20.5018	9
Guizhou	0.65	0.00156649	0.00898084	11.6239	2.2
Yunnan	1.47	0.0369155	0	18.3604	8.6
Xizang	0.06	0.0177223	0	108.333	0
Shaanxi	1.77	0.00543895	0.0203569	12.4206	3.8
Gansu	1.55	0.00733765	0	10.5306	7.2
Qinghai	1.26	0.0135179	0	24.9951	0.6
Ningxia	2.04	0.0261866	0	11.3721	3.8
Xinjiang	1.44	0.100691	0.00684182	34.3804	3.2

## Sheet: 2011
	Green Investment	Green Insurance	Green Securities	Green Credit	Carbon Finance
Beijing	1.31	0.263647	12.7183	0.136068	0.00141044
Tianjin	1.55	0.0319177	1.67918	34.5788	0.00564175
Hebei	2.54	0.0274014	1.21518	99.1544	0.0662906
Shanxi	2.21	0.0337974	0	14.6667	0.0366714
Inner Mongolia	2.76	0.160723	0	15.2569	0.107193
Liaoning	1.69	0.0418039	0	49.6577	0.0564175
Jilin	0.96	0.0784673	0	10.1807	0.0366714
Heilongjiang	1.21	0.0910528	1.3342	12.0591	0.0253879
Shanghai	0.75	0.344343	0.376915	26.3794	0.00705219
Jiangsu	1.17	0.0336897	3.27732	100.283	0.0282087
Zhejiang	0.74	0.02027	3.32982	14.7343	0.0155148
Anhui	1.75	0.0806596	0	5.27002	0.0239774
Fujian	1.13	0.021358	1.47452	18.2032	0.0310296
Jiangxi	2.06	0.0534888	0.650771	16.2549	0.00846262
Shandong	1.35	0.00736991	0	142.77	0.0564175
Henan	0.61	0.0118926	0.707381	14.5425	0.0423131
Hubei	1.32	0.0232936	3.5415	17.7489	0.0155148
Hunan	0.65	0.0568077	0.767135	16.5473	0.0282087
Guangdong	0.62	0.0093081	6.83721	33.6842	0.0296192
Guangxi	1.38	0.00518814	0	7.07289	0.0112835
Hainan	1.11	0.0241372	0	0.941051	0.00282087
Chongqing	2.59	0.0205445	8.52316	146.598	0.00423131
Sichuan	0.67	0.0718164	2.49277	72.841	0.0705219
Guizhou	1.14	0.00323363	0.646174	3.77777	0.0239774
Yunnan	1.34	0.0538348	0	36.5466	0.0634697
Xizang	4.66	0.192016	0	0.111404	0
Shaanxi	1.23	0.0117219	1.38936	4436.73	0.0169252
Gansu	1.19	0.0195404	0	28.6792	0.0479549
Qinghai	1.57	0.067483	0	15.9694	0.0126939
Ningxia	2.73	0.0300447	0	26.5065	0.0832158
Xinjiang	2.01	0.10596	0.388527	45.3517	0.0409027

## Sheet: 2012
	Green Investment	Green Insurance	Green Securities	Green Credit	Carbon Finance
Beijing	1.92	0.308244	15.6977	7.81117	0.689127
Tianjin	1.22	0.0477041	1.28699	14.1493	0.153139
Hebei	1.83	0.0415469	1.00478	12.8375	5.35988
Shanxi	2.71	0.046068	0	6.22323	3.98162
Inner Mongolia	2.8	0.163875	1.00819	11.9931	6.27871
Liaoning	2.75	0.0449337	0	9.90286	2.5268
Jilin	0.87	0.0757166	0	12.9671	3.06279
Heilongjiang	1.59	0.095694	1.0859	13.0567	3.67534
Shanghai	0.66	0.26695	0.68803	9.73162	0.306279
Jiangsu	1.22	0.0400762	3.07728	12.5213	1.60796
Zhejiang	1.08	0.0332089	2.59034	7.99063	0.842266
Anhui	1.92	0.0940175	0	6.09753	1.22511
Fujian	1.13	0.0243357	1.26131	5.2396	1.53139
Jiangxi	2.44	0.0620793	0.550333	9.10939	1.37825
Shandong	1.48	0.0203777	0	12.4282	5.13017
Henan	0.71	0.0297744	0.562149	8.58379	2.37366
Hubei	1.28	0.0260074	4.24725	11.6169	1.91424
Hunan	0.86	0.0601033	0.798233	7.90878	1.60796
Guangdong	0.46	0.0194402	8.16047	4.47624	1.99081
Guangxi	1.46	0.00751856	0	6.4196	2.22052
Hainan	1.57	0.0353896	0	3.33195	0.306279
Chongqing	1.64	0.00119268	7.25454	10.5991	1.14855
Sichuan	0.75	0.0838287	2.14112	16.3519	14.3185
Guizhou	1.01	0.00795005	0.648266	10.5685	4.05819
Yunnan	1.28	0.0509848	0	16.4797	8.95865
Xizang	0.57	0.16161	0	40.7692	0
Shaanxi	1.25	0.0202699	1.88118	22.579	3.06279
Gansu	2.15	0.0384363	0	7.1444	5.74273
Qinghai	1.27	0.0756789	0	27.3086	2.29709
Ningxia	2.38	0.0642578	0	6.28248	4.44104
Xinjiang	3.4	0.114825	0.338789	27.074	7.81011

## Sheet: 2013
	Green Investment	Green Insurance	Green Securities	Green Credit	Carbon Finance
Beijing	2.22	0.3275	19.7141	7.23263	2.38095
Tianjin	1.33	0.0761878	1.77686	12.1888	0.793651
Hebei	1.73	0.0484525	1.16668	12.2851	4.7619
Shanxi	2.68	0.0507156	0	7.58056	0.793651
Inner Mongolia	3.01	0.209637	1.00819	15.2902	4.7619
Liaoning	1.28	0.0598387	0	12.2034	1.5873
Jilin	0.81	0.0734675	0	12.6579	5.55556
Heilongjiang	2.08	0.0991829	1.45934	12.215	0
Shanghai	0.87	0.296686	0.715358	9.84416	0
Jiangsu	1.49	0.0496433	2.81188	12.6951	3.96825
Zhejiang	1.04	0.0392422	4.38284	8.17765	1.5873
Anhui	2.66	0.0931568	0	8.6259	4.7619
Fujian	1.3	0.0260612	2.98289	7.63134	1.5873
Jiangxi	1.67	0.0617012	0.497119	8.93094	3.1746
Shandong	1.55	0.0207036	0	13.3515	0.793651
Henan	0.9	0.0368039	0.535937	8.76392	11.9048
Hubei	1.02	0.0257287	5.38191	12.2714	6.34921
Hunan	0.95	0.064056	1.03395	9.29561	2.38095
Guangdong	0.57	0.0266556	7.25751	4.41933	1.5873
Guangxi	1.52	0.0147942	0	6.62293	0.793651
Hainan	0.85	0.0616069	0	2.3979	0
Chongqing	1.37	0.0291168	7.42799	10.0421	3.1746
Sichuan	0.89	0.0941598	3.25158	14.9462	3.96825
Guizhou	1.37	0.0162401	0.683159	12.5317	15.873
Yunnan	1.68	0.0628602	0	14.6647	3.96825
Xizang	3.5	0.163178	0	44.9219	0
Shaanxi	1.38	0.0314596	1.59618	23.7017	0
Gansu	2.81	0.0518796	0	8.85717	1.5873
Qinghai	1.75	0.0904338	0	25.5548	7.14286
Ningxia	2.82	0.0915799	0	5.57716	0
Xinjiang	3.81	0.14559	0.307144	30.7155	4.7619

## Sheet: 2014
	Green Investment	Green Insurance	Green Securities	Green Credit	Carbon Finance
Beijing	2.93	0.291173	19.4631	7.13097	3.50877
Tianjin	1.77	0.0853229	2.75867	45.3594	0
Hebei	1.55	0.0518402	1.12881	41.2879	3.50877
Shanxi	2.3	0.0583079	0	16.7822	1.75439
Inner Mongolia	3.16	0.213201	0.993933	29.107	7.01754
Liaoning	0.95	0.0575059	0	34.4863	1.75439
Jilin	0.71	0.068619	0	26.7747	0
Heilongjiang	1.21	0.086404	1.89446	21.8119	0
Shanghai	1.06	0.374183	0.794545	17.4219	0
Jiangsu	1.35	0.0481566	4.40497	26.3892	1.75439
Zhejiang	1.18	0.044267	5.0366	16.2588	1.75439
Anhui	2.06	0.0884763	0.55139	18.1698	0
Fujian	0.8	0.0272293	2.61163	18.2246	0
Jiangxi	1.47	0.0645416	0.550389	26.0736	1.75439
Shandong	1.39	0.0184355	0	24.5403	0
Henan	0.84	0.0253595	0.472865	22.7973	0
Hubei	1.16	0.024155	5.08638	32.1044	1.75439
Hunan	0.79	0.0698901	0.873928	22.2041	0
Guangdong	0.45	0.0323833	9.94462	11.2999	0
Guangxi	1.28	0.0249488	0	19.582	0
Hainan	0.6	0.0566807	0	12.1807	0
Chongqing	1.18	0.0236626	8.02441	24.6218	0
Sichuan	1.01	0.0899152	3.45781	27.264	59.6491
Guizhou	1.84	0.0332703	1.08218	20.4604	0
Yunnan	1.19	0.0612512	0	18.8542	1.75439
Xizang	1.56	0.145766	0	31.6151	0
Shaanxi	1.61	0.0303432	1.7736	28.3182	0
Gansu	2.1	0.0575785	0	28.0756	12.2807
Qinghai	1.3	0.0975104	0	34.7245	0
Ningxia	2.86	0.112774	0	14.2283	0
Xinjiang	4.24	0.162777	0.288926	42.7162	1.75439

## Sheet: 2015
	Green Investment	Green Insurance	Green Securities	Green Credit	Carbon Finance
Beijing	1.79	0.371553	21.2935	8.99524	1.90476
Tianjin	0.76	0.107773	2.14617	43.7123	0.952381
Hebei	1.33	0.0639844	1.49382	41.0942	7.14286
Shanxi	2.02	0.058394	0	18.8055	11.4286
Inner Mongolia	3.01	0.221058	0.821627	34.0573	1.42857
Liaoning	1.02	0.0680586	0.461655	37.6943	0
Jilin	0.79	0.0790988	0	34.8422	0
Heilongjiang	1.04	0.0994128	1.22335	23.7543	4.7619
Shanghai	0.88	0.498321	0.68143	20.735	1.42857
Jiangsu	1.36	0.0443819	5.37226	27.8669	10
Zhejiang	1.03	0.04951	9.16237	18.5489	0.952381
Anhui	2	0.0897609	0.839605	21.1703	5.2381
Fujian	0.88	0.027428	3.55344	21.4294	2.38095
Jiangxi	1.41	0.0582365	0.524925	37.3355	9.52381
Shandong	1.1	0.0335287	0	28.9902	7.61905
Henan	0.8	0.0377528	0.509599	34.0371	4.28571
Hubei	0.84	0.0232456	4.49424	32.9854	6.19048
Hunan	1.86	0.0778541	1.13886	25.7015	8.57143
Guangdong	0.4	0.0324515	11.461	14.6903	0
Guangxi	1.55	0.0295439	1.82992	29.7384	0.952381
Hainan	0.6	0.0586952	0	22.3333	0.952381
Chongqing	0.88	0.029437	5.98619	28.798	2.85714
Sichuan	0.72	0.0889879	3.24043	22.7883	0.952381
Guizhou	1.31	0.0292756	0.996307	27.9191	0.47619
Yunnan	1.03	0.0648971	0	32.1205	0.47619
Xizang	0.81	0.255029	0	4.99109	0
Shaanxi	1.33	0.0282854	2.52343	38.6497	6.66667
Gansu	1.8	0.0614363	0	42.4236	1.90476
Qinghai	1.44	0.143469	0	48.5482	0
Ningxia	2.98	0.105672	0	21.8994	0.952381
Xinjiang	3.1	0.174788	0.449375	48.1349	0

## Sheet: 2016
	Green Investment	Green Insurance	Green Securities	Green Credit	Carbon Finance
Beijing	2.63	0.413306	23.7182	6.96129	2.12766
Tianjin	0.3	0.119832	1.83228	18.7883	0.851064
Hebei	1.25	0.0661126	1.08317	43.1053	7.23404
Shanxi	4.03	0.0664002	0	21.6359	12.766
Inner Mongolia	2.52	0.226581	1.05885	38.5961	2.97872
Liaoning	0.79	0.084385	0.549167	40.5827	0
Jilin	0.57	0.12036	0	30.2742	0.425532
Heilongjiang	1.13	0.110799	1.31101	19.3744	5.10638
Shanghai	0.73	0.432438	0.799956	25.0106	1.2766
Jiangsu	0.99	0.0456084	6.0102	28.5423	11.4894
Zhejiang	1.38	0.0447929	8.45945	18.9691	0.851064
Anhui	2.04	0.0983134	0.71815	21.0524	5.53191
Fujian	0.66	0.0248086	2.99789	26.8329	2.12766
Jiangxi	1.69	0.0560543	0.632658	36.549	8.51064
Shandong	1.15	0.040181	0	31.7515	7.23404
Henan	0.89	0.0609834	1.18898	34.1621	5.53191
Hubei	1.42	0.0191316	4.20456	32.3809	6.38298
Hunan	0.64	0.0811514	0.841228	25.0839	8.51064
Guangdong	0.45	0.0345757	11.0999	16.0908	0
Guangxi	1.11	0.0378304	1.54759	28.148	1.2766
Hainan	0.75	0.0533611	0	21.6974	0.851064
Chongqing	0.81	0.0272747	4.77184	28.7761	2.55319
Sichuan	0.88	0.0842072	2.66161	22.7524	0.851064
Guizhou	1.01	0.0342142	0.642871	28.4972	0.425532
Yunnan	0.99	0.0603262	0	33.2525	0.425532
Xizang	1.22	0.439444	0	6.82731	0
Shaanxi	1.64	0.0319708	2.27226	37.0006	6.38298
Gansu	1.63	0.0662281	0	44.552	1.70213
Qinghai	2.19	0.180637	0	44.4379	0
Ningxia	3.19	0.126989	0	33.888	0.851064
Xinjiang	3.24	0.167084	0.372709	37.8393	0

## Sheet: 2017
	Green Investment	Green Insurance	Green Securities	Green Credit	Carbon Finance
Beijing	2.38	0.492096	26.7902	6.12334	3.04183
Tianjin	0.38	0.154992	2.64784	36.0259	0.760456
Hebei	1.68	0.0737589	1.15616	38.1258	7.60456
Shanxi	1.86	0.0791173	0	16.4312	12.1673
Inner Mongolia	2.61	0.235218	1.93739	32.9828	3.80228
Liaoning	0.92	0.0930466	0.292964	34.687	0
Jilin	0.6	0.146889	0	38.3735	0.380228
Heilongjiang	0.81	0.106657	1.64385	23.5325	4.56274
Shanghai	0.53	0.484922	1.97919	23.1892	0.760456
Jiangsu	0.83	0.0461414	5.3449	28.7223	10.2662
Zhejiang	0.87	0.0484314	8.55325	18.5462	0.760456
Anhui	1.84	0.103755	1.1421	21.5402	5.32319
Fujian	0.69	0.0273001	3.37525	26.0994	2.6616
Jiangxi	1.52	0.0686279	0.488947	33.2171	7.60456
Shandong	1.31	0.0478628	0	30.1177	7.22433
Henan	1.43	0.0715088	0.907976	33.9796	4.94297
Hubei	1.19	0.0298365	4.03986	31.8179	5.70342
Hunan	0.63	0.0921745	0.699569	27.0979	7.60456
Guangdong	0.41	0.0387659	10.0508	13.7016	0
Guangxi	0.9	0.0181619	1.22877	28.4945	1.14068
Hainan	1.21	0.487989	0	16.4992	0.760456
Chongqing	1.14	0.0344115	3.65925	31.4181	2.28137
Sichuan	0.83	0.0206591	2.24162	24.8571	0.760456
Guizhou	1.6	0.057467	0.391389	28.4717	0.380228
Yunnan	0.86	0.0172232	0	32.2712	0.380228
Xizang	2.07	0.954388	0	4.74974	0
Shaanxi	1.44	0.0353124	1.80565	37.0206	6.46388
Gansu	1.16	0.0671892	0	42.3218	1.90114
Qinghai	1.55	0.206201	0	45.7108	0
Ningxia	2.44	0.167647	0	25.4546	0.760456
Xinjiang	3.53	0.180971	0.198102	43.414	0

## Sheet: 2018
	Green Investment	Green Insurance	Green Securities	Green Credit	Carbon Finance
Beijing	1.71847	0.677594	18.0157	10.7818	3.87324
Tianjin	0.183882	0.25249	2.30779	47.9349	0.704225
Hebei	1.56455	0.0996332	0.944196	39.708	7.74648
Shanxi	0.718484	0.105248	0	18.1467	11.6197
Inner Mongolia	1.08367	0.234454	0.927842	33.2038	4.57746
Liaoning	0.566109	0.116924	0.37078	40.1649	0
Jilin	0.236568	0.203849	0	36.812	0.352113
Heilongjiang	0.339356	0.10918	1.41934	29.1832	4.22535
Shanghai	0.414252	0.492865	1.76871	23.1107	1.40845
Jiangsu	1.8476	0.0505714	6.81305	22.9941	9.85915
Zhejiang	1.16967	0.0580995	7.23556	17.7498	0.704225
Anhui	1.30422	0.116828	1.03518	19.8334	4.92958
Fujian	0.579539	0.0338817	2.80583	25.6308	2.8169
Jiangxi	0.814815	0.0921682	0.645669	35.2107	7.04225
Shandong	2.45039	0.0564532	0	33.1436	7.04225
Henan	1.65623	0.091828	0.734721	32.7333	4.57746
Hubei	1.12215	0.0391799	3.03374	25.1357	5.28169
Hunan	0.566368	0.130053	0.501163	21.3094	7.04225
Guangdong	0.945754	0.0501515	11.076	13.0093	0.704225
Guangxi	0.47546	0.0621325	1.15754	25.5102	1.05634
Hainan	0.13972	0.115197	0	15.9462	0.704225
Chongqing	0.573599	0.0478069	4.5399	23.3427	2.11268
Sichuan	0.795962	0.0907702	2.4679	21.9175	0.704225
Guizhou	0.559653	0.0519867	0.32499	27.7435	0.352113
Yunnan	0.368281	0.0531619	0	28.9079	0.352113
Xizang	0.0702471	0.639875	0	6.94789	0
Shaanxi	0.812233	0.0495791	1.67104	34.1893	7.04225
Gansu	0.230628	0.098874	0	43.9697	2.11268
Qinghai	0.106146	0.304314	0	52.3099	0
Ningxia	0.217973	0.202577	0	29.0541	1.05634
Xinjiang	0.995598	0.190892	0.202041	39.9357	0

## Sheet: 2019
	Green Investment	Green Insurance	Green Securities	Green Credit	Carbon Finance
Beijing	1.63737	0.797439	14.1951	4.18134	4.10095
Tianjin	0.175204	0.251981	2.0531	27.7557	0.946372
Hebei	1.49071	0.117213	0.922302	37.1147	6.94006
Shanxi	0.684574	0.122648	0	18.5939	10.7256
Inner Mongolia	1.03252	0.246801	0.754787	31.1478	5.36278
Liaoning	0.539391	0.131226	0.51469	37.2751	0
Jilin	0.225402	0.224772	0	20.7772	0.315457
Heilongjiang	0.323339	0.114658	1.35268	38.021	3.78549
Shanghai	0.3947	0.593999	1.66798	21.5966	1.89274
Jiangsu	1.7604	0.0917557	8.05966	21.5665	10.7256
Zhejiang	1.11446	0.0624552	9.62346	14.8393	1.89274
Anhui	1.24267	0.114458	1.26065	20.3385	4.4164
Fujian	0.552187	0.0342703	2.83687	22.5453	2.83912
Jiangxi	0.776359	0.0999471	0.776175	24.4672	6.30915
Shandong	2.33474	0.0683213	2.00633	29.2121	7.25552
Henan	1.57806	0.0336989	0.841994	32.9655	4.10095
Hubei	1.06919	0.0505872	2.75435	21.492	4.73186
Hunan	0.539637	0.131664	1.25678	20.1056	6.30915
Guangdong	0.901118	0.0532811	9.59862	11.3269	2.83912
Guangxi	0.45302	0.0620037	1.22518	25.9509	0.946372
Hainan	0.133125	0.119164	0	12.2951	0.630915
Chongqing	0.546527	0.0443671	4.31995	23.7142	1.89274
Sichuan	0.758396	0.0613352	2.56158	20.9871	0.630915
Guizhou	0.533239	0.0537733	0.386638	24.7159	0.315457
Yunnan	0.350899	0.061413	0	20.7033	0.946372
Xizang	0.0669317	0.753635	0	4.8	0
Shaanxi	0.773898	0.0580166	2.9416	30.0366	6.30915
Gansu	0.219743	0.357436	0	42.09	1.89274
Qinghai	0.101136	0.446498	0	45.6558	0
Ningxia	0.207685	0.250747	0	27.9111	0.946372
Xinjiang	0.94861	0.255455	0.230024	32.995	0
